# Supplementary material
Source: ML conference proceedings conference paper supplement (https://proceedings.neurips.cc/paper_files/paper/2016/hash/bb7946e7d85c81a9e69fee1cea4a087c-Abstract.html)
Supplement: Supplementary file [file bb7946e7d85c81a9e69fee1cea4a087c-Supplemental.zip]

## Appendix

### A. Proof of Theorem 1

This section provides the detailed proof of Theorem 1. The following error decomposition is proved in terms of the definitions of  $g_\lambda$  and  $\hat{g}_\lambda$  in Section 3.

**Proposition 1** Denote  $D(\lambda) = \inf_{g \in \mathcal{H}} \{\mathcal{E}(g) - \mathcal{E}(f_\rho) + \lambda \|g\|_{\mathcal{H}}^2\}$ . For any  $\mathbf{z} \in \mathcal{Z}^m$ , the excess generalization error of  $f_{\mathbf{z}}$  in Section 3 can be decomposed as below:

$$\mathcal{E}(\pi(f_{\mathbf{z}})) - \mathcal{E}(f_\rho) \leq E_1 + E_2 + D(\lambda),$$

where

$$E_1 = \mathcal{E}(\pi(f_{\mathbf{z}})) - \mathcal{E}_{\mathbf{z}}(\pi(f_{\mathbf{z}})) + \mathcal{E}_{\mathbf{z}}(\hat{g}_\lambda) - \mathcal{E}(\hat{g}_\lambda)$$

and

$$E_2 = \mathcal{E}(\hat{g}_\lambda) + \lambda m \|\hat{g}_\lambda\|_{\ell_2}^2 - \mathcal{E}(g_\lambda) - \lambda \|g_\lambda\|_{\mathcal{H}}^2.$$

**Proof:** It is easy to deduce that

$$\begin{aligned} & \mathcal{E}(\pi(f_{\mathbf{z}})) - \mathcal{E}(f_\rho) \\ \leq & \mathcal{E}(\pi(f_{\mathbf{z}})) - \mathcal{E}_{\mathbf{z}}(\pi(f_{\mathbf{z}})) + \mathcal{E}_{\mathbf{z}}(f_{\mathbf{z}}) - \mathcal{E}(f_\rho) \\ \leq & \mathcal{E}(\pi(f_{\mathbf{z}})) - \mathcal{E}_{\mathbf{z}}(\pi(f_{\mathbf{z}})) + [\mathcal{E}_{\mathbf{z}}(f_{\mathbf{z}}) + \lambda m \|f_{\mathbf{z}}\|_{\ell_2}^2 - (\mathcal{E}_{\mathbf{z}}(\hat{g}_\lambda) + \lambda m \|\hat{g}_\lambda\|_{\ell_2}^2)] \\ & + \mathcal{E}_{\mathbf{z}}(\hat{g}_\lambda) - \mathcal{E}(\hat{g}_\lambda) + \mathcal{E}(\hat{g}_\lambda) + \lambda m \|\hat{g}_\lambda\|_{\ell_2}^2 - \mathcal{E}(f_\rho) \\ \leq & E_1 + \mathcal{E}(\hat{g}_\lambda) + \lambda m \|\hat{g}_\lambda\|_{\ell_2}^2 - \mathcal{E}(f_\rho), \end{aligned}$$

where the last inequality follows from the definitions of  $f_{\mathbf{z}}$ ,  $\hat{g}_\lambda$ .

According to the definition  $g_\lambda$ , we can see that

$$\mathcal{E}(\hat{g}_\lambda) + \lambda m \|\hat{g}_\lambda\|_{\ell_2}^2 - \mathcal{E}(f_\rho) = E_2 + \mathcal{E}(g_\lambda) - \mathcal{E}(f_\rho) + \lambda \|g_\lambda\|_{\mathcal{H}}^2.$$

Combining the above two estimates, we get the desired result.  $\square$

The error term  $E_1$  depends on the full samples and the subsampling set, which usually is called as the sample error in learning theory [1]. The error term  $E_2$  is induced by the vary from the data dependent hypothesis space  $\mathcal{H}_m$  to data independent hypothesis space  $\mathcal{H}$ , which is called the hypothesis error [2, 4]. The last term is the approximation error, which reflects the approximation ability of learning model to the regression function.

Before error estimates, we provide the upper bounds of  $f_{\mathbf{z}}$  and  $f_\lambda$ .

**Lemma 1** For any  $\mathbf{z} \in \mathcal{Z}^m$ , there holds

$$\|f_{\mathbf{z}}\|_{\ell_1} \leq \frac{1}{\sqrt{\lambda}} \text{ and } \|f_\lambda\|_{\infty} \leq \frac{\sqrt{D(\lambda)}}{\lambda}.$$

**Proof:** From the definition of  $f_{\mathbf{z}}$ , we can see that  $\lambda m \|f_{\mathbf{z}}\|_{\ell_2}^2 \leq \mathcal{E}_{\mathbf{z}}(0) \leq 1$ , which means

$$\|f_{\mathbf{z}}\|_{\ell_1} \leq \sqrt{m} \|f_{\mathbf{z}}\|_{\ell_2} \leq \frac{1}{\sqrt{\lambda}}.$$

To estimate  $f_\lambda$ , we introduce an auxiliary function  $\phi : \mathbb{R} \rightarrow \mathbb{R}$  defined as

$$\phi(\theta) = \int_{\mathcal{X}} (L_K(f_\lambda + \theta h) - f_\rho)^2 d\rho_{\mathcal{X}} + \lambda \int_{\mathcal{X}} (f_\lambda + \theta h)^2 d\rho_{\mathcal{X}},$$

where  $h$  is any fixed function in  $L_{\rho_{\mathcal{X}}}^2$ .

Note that  $\phi(0) = D(\lambda) + \mathcal{E}(f_\rho)$ . It means that  $\frac{d\phi(\theta)}{d\theta}|_{\theta=0} = 0$ . Then

$$\phi'(0) = 2 \int_{\mathcal{X}} (L_K f_\lambda(x) - f_\rho(x)) \left[ \int_{\mathcal{X}} h(t) K(x, t) d\rho_{\mathcal{X}}(t) \right] d\rho_{\mathcal{X}}(x) + \lambda \int_{\mathcal{X}} f_\lambda(x) h(x) d\rho_{\mathcal{X}} = 0.$$

According to the arbitrariness of  $h$ , we get

$$\lambda f_\lambda(t) = - \int_{\mathcal{X}} (L_K f_\lambda(x) - f_\rho(x)) K(x, t) d\rho_{\mathcal{X}}(x), \forall t \in \mathcal{X}.$$

Then, for any  $t \in \mathcal{X}$ ,

$$\begin{aligned} |f_\lambda(t)| &= \lambda^{-1} \left| \int_{\mathcal{X}} (L_K f_\lambda(x) - f_\rho(x)) K(x, t) d\rho_{\mathcal{X}}(x) \right| \\ &\leq \lambda^{-1} \sqrt{\int_{\mathcal{X}} (L_K f_\lambda(x) - f_\rho(x))^2 d\rho_{\mathcal{X}}(x)} \sqrt{\int_{\mathcal{X}} K^2(x, t) d\rho_{\mathcal{X}}(x)} \\ &\leq \frac{\sqrt{D(\lambda)}}{\lambda}. \end{aligned}$$

This completes the proof of Lemma 1.  $\square$

### A.1. Hypothesis error estimate

The hypothesis error  $E_2$  involves the random variables with values in Hilbert space. To bound this term, we introduce the following concentration inequality in [3].

**Lemma 2** *Let  $\mathcal{H}$  be a Hilbert space and  $\xi$  be independent random variable on  $\mathcal{Z}$  with values in  $\mathcal{H}$ . Assume that  $\|\xi\|_{\mathcal{H}} \leq \tilde{M} < \infty$  almost surely. Let  $\{z_i\}_{i=1}^m$  be independent random samples from  $\rho$ . Then, for any  $\delta \in (0, 1)$ ,*

$$\left\| \frac{1}{m} \sum_{i=1}^m \xi(z_i) - E\xi \right\|_{\mathcal{H}} \leq \frac{\tilde{M} \log(\frac{1}{\delta})}{m} + \sqrt{\frac{2E\|\xi\|_{\mathcal{H}}^2 \log(\frac{1}{\delta})}{m}}$$

holds true with confidence  $1 - \delta$ .

**Proposition 2** *For any  $0 < \delta < 1$ , with confidence  $1 - \delta$ , there holds*

$$\mathcal{E}(\hat{g}_\lambda) - \mathcal{E}(g_\lambda) \leq D(\lambda) \left( 1 + \frac{4 \log(1/\delta)}{m\lambda} + \frac{8 \log^2(1/\delta)}{m^2 \lambda^2} \right)$$

and

$$E_2 \leq D(\lambda) \left( 1 + \frac{6 \log(2/\delta)}{m\lambda} + \frac{8 \log^2(2/\delta)}{m^2 \lambda^2} + \sqrt{\frac{2 \log(2/\delta)}{m\lambda}} \right).$$

**Proof:** From the definitions of  $g_\lambda$  and  $\hat{g}_\lambda$ , we have

$$m\lambda \|\hat{g}_\lambda\|_{\ell_2}^2 - \lambda \|g_\lambda\|_{\mathcal{H}}^2 = \lambda \left( \frac{1}{m} \sum_{i=1}^m (f_\lambda(\bar{x}_i))^2 - \int_{\mathcal{X}} (f_\lambda(x))^2 d\rho_{\mathcal{X}}(x) \right).$$

Let  $\xi_1(x) = (f_\lambda(x))^2$ . From Lemma 1, we get  $|\xi_1(x)| \leq D(\lambda)/\lambda^2$  for any  $x \in \mathcal{X}$  and

$$E\xi_1^2 \leq \frac{D(\lambda)}{\lambda^2} \int_{\mathcal{X}} (f_\lambda(x))^2 d\rho_{\mathcal{X}}(x) \leq \frac{(D(\lambda))^2}{\lambda^3}.$$

Applying Lemma 2 to random variable  $\xi_1$ , we get for any  $\delta \in (0, 1)$

$$m\lambda \|\hat{g}_\lambda\|_{\ell_2}^2 - \lambda \|g_\lambda\|_{\mathcal{H}}^2 \leq \frac{2D(\lambda) \log(1/\delta)}{m\lambda} + D(\lambda) \sqrt{\frac{2 \log(1/\delta)}{m\lambda}} \quad (1)$$

with confidence  $1 - \delta$ .

Now we turn to estimate  $\mathcal{E}(\hat{g}_\lambda) - \mathcal{E}(g_\lambda)$ . Observe that

$$\begin{aligned}\mathcal{E}(\hat{g}_\lambda) - \mathcal{E}(g_\lambda) &= \|\hat{g}_\lambda - f_\rho\|_{L^2_{\rho_{\mathcal{X}}}}^2 - \|g_\lambda - f_\rho\|_{L^2_{\rho_{\mathcal{X}}}}^2 \\ &\leq \|\hat{g}_\lambda - g_\lambda\|_{L^2_{\rho_{\mathcal{X}}}} \cdot \|\hat{g}_\lambda + g_\lambda - 2f_\rho\|_{L^2_{\rho_{\mathcal{X}}}} \\ &\leq \|\hat{g}_\lambda - g_\lambda\|_{L^2_{\rho_{\mathcal{X}}}} \cdot (\|\hat{g}_\lambda - g_\lambda\|_{L^2_{\rho_{\mathcal{X}}}} + 2\|g_\lambda - f_\rho\|_{L^2_{\rho_{\mathcal{X}}}}) \\ &\leq 2\|\hat{g}_\lambda - g_\lambda\|_{L^2_{\rho_{\mathcal{X}}}}^2 + D(\lambda),\end{aligned}\tag{2}$$

where the last inequality follows from

$$2\|g_\lambda - f_\rho\|_{L^2_{\rho_{\mathcal{X}}}} \cdot \|\hat{g}_\lambda - g_\lambda\|_{L^2_{\rho_{\mathcal{X}}}} \leq \|g_\lambda - f_\rho\|_{L^2_{\rho_{\mathcal{X}}}}^2 + \|\hat{g}_\lambda - g_\lambda\|_{L^2_{\rho_{\mathcal{X}}}}^2.$$

Denote  $\xi_2(x) = f_\lambda(x)K(x, t)$ . Then,  $\|\xi_2\|_\infty \leq \|f_\lambda\|_\infty \leq \sqrt{D(\lambda)}/\lambda$  and  $E\|\xi_2\|^2 \leq \|f_\lambda\|_{L^2_{\rho_{\mathcal{X}}}}^2 \leq D(\lambda)/\lambda$ . Applying Lemma 2 to  $\xi_2$ , we get with confidence  $1 - \delta$ ,

$$\|\hat{g}_\lambda - g_\lambda\|_{L^2_{\rho_{\mathcal{X}}}} = \left\| \frac{1}{m} \sum_{i=1}^m \xi_2(\bar{x}_i) - E\xi_2 \right\|_{L^2_{\rho_{\mathcal{X}}}} \leq \frac{2\sqrt{D(\lambda)}}{m\lambda} \log(1/\delta) + \sqrt{\frac{2D(\lambda) \log(1/\delta)}{m\lambda}}.$$

Then, from (2), there holds

$$\mathcal{E}(\hat{g}_\lambda) - \mathcal{E}(g_\lambda) \leq D(\lambda) + \frac{4D(\lambda) \log(1/\delta)}{m\lambda} + \frac{8D(\lambda) \log^2(1/\delta)}{m^2\lambda^2}.\tag{3}$$

Combining the estimates (1) and (3), we get the desired upper bound of  $E_2$ .  $\square$

## A.2. Sample error estimate

Given any  $R > 0$ , define a class of functions as

$$\mathcal{B}_R = \left\{ f = \sum_{i=1}^m \alpha_i K(u_i, \cdot) : \sum_{i=1}^m |\alpha_i| \leq R, \{u_i\}_{i=1}^m \in \mathcal{X}^m \right\}.\tag{4}$$

Recently, some tight estimates have been established in [4, 5] to bound the empirical covering number of  $\mathcal{B}_1$ . Now recall some basic definitions for covering numbers.

**Definition 1** Let  $(\mathcal{U}, d)$  be a pseudo-metric space and denote a subset  $S \subset \mathcal{U}$ . For every  $\epsilon > 0$ , the covering number  $\mathcal{N}(S, \epsilon, d)$  of  $S$  with respect to  $\epsilon, d$  is defined as the minimal number of balls of radius  $\epsilon$  whose union covers  $S$ , that is,

$$\mathcal{N}(S, \epsilon, d) = \min \left\{ l \in \mathbb{N} : S \subset \bigcup_{j=1}^l B(s_j, \epsilon) \text{ for some } \{s_j\}_{j=1}^l \subset \mathcal{U} \right\},$$

where  $B(s_j, \epsilon) = \{s \in \mathcal{U} : d(s, s_j) \leq \epsilon\}$  is a ball in  $\mathcal{U}$ .

The empirical covering number with  $\ell_2$  metric is defined as below.

**Definition 2** Let  $\mathcal{F}$  be a set of functions on  $\mathcal{X}$ ,  $\mathbf{u} = (x_i)_{i=1}^k$  and  $\mathcal{F}|_{\mathbf{u}} = \{(f(u_i))_{i=1}^k : f \in \mathcal{F}\} \subset \mathbb{R}^k$ . Set  $\mathcal{N}_{2, \mathbf{u}}(\mathcal{F}, \epsilon) = \mathcal{N}(\mathcal{F}|_{\mathbf{u}}, \epsilon, d_2)$ . The  $\ell_2$  empirical covering number of  $\mathcal{F}$  is defined by

$$\mathcal{N}_2(\mathcal{F}, \epsilon) = \sup_{k \in \mathbb{N}} \sup_{\mathbf{u} \in \mathcal{X}^k} \mathcal{N}_{2, \mathbf{u}}(\mathcal{F}, \epsilon), \epsilon > 0,$$

where  $\ell_2$  metric

$$d_2(\mathbf{a}, \mathbf{b}) = \left( \frac{1}{k} \sum_{i=1}^k |a_i - b_i|^2 \right)^{\frac{1}{2}}, \forall \mathbf{a} = (a_i)_{i=1}^k \in \mathbb{R}^k, \mathbf{b} = (b_i)_{i=1}^k \in \mathbb{R}^k.$$

The following concentration inequality, proved in [6], is used for our sample error analysis.

**Lemma 3** Assume that there are constants  $B, c > 0$  and  $\alpha \in [0, 1]$  such that  $\|f\|_\infty \leq B$  and  $Ef^2 \leq c(Ef)^\alpha$  for every  $f \in \mathcal{F}$ . If for some  $a > 0$  and  $p \in (0, 2)$ ,

$$\log(\mathcal{N}_2(\mathcal{F}, \epsilon)) \leq a\epsilon^{-p}, \forall \epsilon > 0,$$

then there exists a constant  $c'_p$  depending only on  $p$  such that for any  $t > 0$ , with probability at least  $1 - e^{-t}$ , there holds

$$Ef - \frac{1}{n} \sum_{i=1}^n f(z_i) \leq \frac{1}{2} \eta^{1-\alpha} (Ef)^\alpha + c'_p \eta + 2 \left( \frac{ct}{n} \right)^{\frac{1}{2-\alpha}} + \frac{18Bt}{n}, \forall f \in \mathcal{F},$$

where

$$\eta := \max \left\{ c^{\frac{2-p}{4-2\alpha+p\alpha}} \left( \frac{a}{n} \right)^{\frac{2}{4-2\alpha+p\alpha}}, B^{\frac{2-p}{2+p}} \left( \frac{a}{n} \right)^{\frac{2}{2+p}} \right\}.$$

The sample error  $E_1$  can be further decomposed as

$$E_1 = E_{11} + E_{12},$$

where

$$E_{11} = \mathcal{E}(\pi(f_{\mathbf{z}})) - \mathcal{E}(f_\rho) - (\mathcal{E}_{\mathbf{z}}(\pi(f_{\mathbf{z}})) - \mathcal{E}_{\mathbf{z}}(f_\rho))$$

and

$$E_{12} = \mathcal{E}_{\mathbf{z}}(\hat{g}_\lambda) - \mathcal{E}_{\mathbf{z}}(f_\rho) - (\mathcal{E}(\hat{g}_\lambda) - \mathcal{E}(f_\rho)).$$

Now we provide the estimates for  $E_{11}$  and  $E_{12}$ .

**Lemma 4** Suppose that  $\mathcal{X}$  is compact subset of  $\mathbb{R}^d$  and  $K \in C^s(\mathcal{X} \times \mathcal{X})$  for some  $s > 0$ . For any  $\delta \in (0, 1)$ , with confidence  $1 - \delta$ , there holds

$$E_{11} \leq \frac{1}{2} (\mathcal{E}(\pi(f_{\mathbf{z}})) - \mathcal{E}(f_\rho)) + c_1 (\lambda^{\frac{p}{2+p}} n^{-\frac{2}{2+p}} + n^{-1} \log(1/\delta)),$$

where  $c_1$  is a positive constant independent of  $n, \lambda, \delta$ , and  $p$  is defined in Theorem 1.

**Proof:** From Lemma 1 and the definition of  $B_R$  in (4), we can see that  $f_{\mathbf{z}} \in \mathcal{B}_R$  with  $R = \lambda^{-\frac{1}{2}}$ . Denote

$$\mathcal{G}_R = \{g(z) = (y - \pi(f)(x))^2 - (y - f_\rho(x))^2 : f \in B_R, z = (x, y) \in \mathcal{Z}\}.$$

It follows that for any  $z \in \mathcal{Z}, g \in \mathcal{G}_R$

$$|g(z)| = |2y - \pi(f)(x) - f_\rho(x)| \cdot |\pi(f)(x) - f_\rho(x)| \leq 8 \quad (5)$$

and

$$Eg^2 = E|2y - \pi(f)(x) - f_\rho(x)|^2 \cdot |\pi(f)(x) - f_\rho(x)|^2 \leq 16Eg. \quad (6)$$

For any  $f_1, f_2 \in \mathcal{B}_R$  and  $z = (x, y) \in \mathcal{Z}$ , denote  $g_1(z) = (y - \pi(f_1)(x))^2 - (y - f_\rho(x))^2$  and  $g_2(z) = (y - \pi(f_2)(x))^2 - (y - f_\rho(x))^2$ . Then,

$$\begin{aligned} |g_1(z) - g_2(z)| &= |2y - \pi(f)(x) - f_\rho(x)| \cdot |\pi(f)(x) - f_\rho(x)| \\ &\leq 4|\pi(f_1)(x) - \pi(f_2)(x)| \\ &\leq 4|f_1(x) - f_2(x)|. \end{aligned}$$

It means that

$$\log \mathcal{N}_2(\mathcal{G}_R, \epsilon) \leq \log \mathcal{N}_2(\mathcal{B}_R, \frac{\epsilon}{4}) \leq \log \mathcal{N}_2(\mathcal{B}_1, \frac{\epsilon}{4R}) \leq c_p (4R)^p \epsilon^{-p}, \quad (7)$$

where the last inequality follows from Theorem 2 in [4] and Theorem 3 in [5].

The inequalities (5)-(7) tells us that Lemma 3 holds true for any  $g \in \mathcal{G}_R$  with  $a = c_p (4R)^p$ ,  $c = 16$ ,  $\alpha = 1$  and  $B = 8$ . Then, for any  $g \in \mathcal{G}_R$ , with confidence  $1 - \delta$

$$Eg - \frac{1}{n} \sum_{i=1}^n g(z_i) \leq \frac{1}{2} (\mathcal{E}(\pi(f)) - \mathcal{E}(f_\rho)) + \tilde{c}_1 ((\lambda^{-\frac{p}{2+p}} n^{-\frac{2}{2+p}} + \log(1/\delta) n^{-1}),$$

where  $\tilde{c}_1$  is a positive constant independent of  $n, \delta, \lambda$ . This completes the proof.  $\square$

**Lemma 5** Suppose that  $\mathcal{X}$  is a compact subset of  $\mathbb{R}^d$  and  $K \in C^s(\mathcal{X} \times \mathcal{X})$  for some  $s > 0$ . For any  $\delta \in (0, 1)$ , with confidence  $1 - \delta$ , there holds

$$E_{12} \leq \frac{1}{2}(\mathcal{E}(\hat{g}_\lambda) - \mathcal{E}(g_\lambda)) + \frac{1}{2}D(\lambda) + c_2 D(\lambda)(\lambda^{-2} n^{-\frac{2}{2+p}} + \lambda^{-2} n^{-1} \log(1/\delta)),$$

where  $c_2$  is a positive constant independent of  $\lambda, \delta, n$ .

**Proof:** Denote

$$\mathcal{G} = \{\hat{g} : \hat{g} := \hat{g}_{\mathbf{v}}(\cdot) = \frac{1}{m} \sum_{i=1}^m f_\lambda(v_i) K(v_i, \cdot), \mathbf{v} = (v_i)_{i=1}^m \in \mathcal{X}^m\}$$

and

$$\mathcal{H} = \{h | h(z) = (y - \hat{g}(x))^2 - (y - f_\rho(x))^2, \hat{g} \in \mathcal{G}\}.$$

It follows that  $\hat{g}_\lambda \in \mathcal{G}$  by the definition of  $\hat{g}_\lambda$  and using  $v_i = \bar{x}_i, i \in \{1, \dots, m\}$ . For any  $g \in \mathcal{G}$

$$\|g\|_\infty \leq \|f_\lambda\|_\infty \leq R := \frac{\sqrt{D(\lambda)}}{\lambda},$$

where the last inequality follows from Lemma 1. Moreover, for any  $h \in \mathcal{H}$

$$\|h\|_\infty = \sup_{(x,y)} |2y - \hat{g}(x) - f_\rho(x)| \cdot |\hat{g}(x) - f_\rho(x)| \leq (3 + R)^2 \quad (8)$$

and

$$Eh^2 \leq (3 + R)^2 E(\hat{g}(x) - f_\rho(x))^2 \leq (3 + R)^2 Eh.$$

For any  $\hat{g}_1, \hat{g}_2 \in \mathcal{G}$ , we have

$$|h_1(z) - h_2(z)| \leq 2(1 + R)|\hat{g}_1(x) - \hat{g}_2(x)|.$$

This means

$$\log \mathcal{N}_2(\mathcal{H}, \varepsilon) \leq \log \mathcal{N}_2\left(\mathcal{G}, \frac{\varepsilon}{2 + 2R}\right) \leq \log \mathcal{N}_2\left(\mathcal{B}_1, \frac{\varepsilon}{2R(1 + R)}\right) \leq c_s 2^p (R^2 + R)^p \varepsilon^{-p}, \quad (9)$$

where the covering number bounds in [4, 5] are used for the last inequality.

The estimates (8)-(9) verifies the conditions of Lemma 3. Then, for any  $0 < \delta < 1$ , we get with confidence at least  $1 - \delta$ ,

$$\begin{aligned} E_{12} &\leq \frac{1}{2}(\mathcal{E}(\hat{g}_\lambda) - \mathcal{E}(g_\lambda)) + \tilde{c} \left( R^2 n^{-\frac{2}{2+p}} + (R + 3)^2 n^{-1} \log(1/\delta) \right) \\ &\leq \frac{1}{2}(\mathcal{E}(\hat{g}_\lambda) - \mathcal{E}(g_\lambda)) + 2\tilde{c} \lambda^{-2} D(\lambda) \left( n^{-\frac{2}{2+p}} + n^{-1} \log(1/\delta) \right), \end{aligned}$$

where  $\tilde{c}$  is a constant independence of  $n, \delta, \lambda$ . This completes the proof.  $\square$

Combining Lemma 4 and Lemma 5, we obtain the estimate of sample error  $E_1$ .

**Proposition 3** Suppose that  $\mathcal{X}$  is compact subset of  $\mathbb{R}^d$  and  $K \in C^s(\mathcal{X} \times \mathcal{X})$  for some  $s > 0$ . For any  $\delta \in (0, 1)$ , with confidence  $1 - 2\delta$ , there holds

$$\begin{aligned} E_1 &\leq \frac{1}{2}(\mathcal{E}(\pi(f_{\mathbf{z}})) - \mathcal{E}(f_\rho) + \mathcal{E}(\hat{g}_\lambda) - \mathcal{E}(g_\lambda)) + c_1 (\lambda^{-\frac{p}{2+p}} n^{-\frac{2}{2+p}} + n^{-1} \log(1/\delta)) \\ &\quad + c_2 \lambda^{-2} D(\lambda) (n^{-\frac{2}{2+p}} + n^{-1} \log(1/\delta)). \end{aligned}$$

where  $c_1, c_2$  is a positive constant independent of  $n, \lambda, \delta$ , and  $p$  is defined in Theorem 1.

### A.3. Proof of Theorem 1

The proof of Theorem 1 is provided as below.

**Proof of Theorem 1.** Combining Propositions 1-3, we have with confidence  $1 - 4\delta$

$$\begin{aligned} \mathcal{E}(\pi(f_{\mathbf{z}})) - \mathcal{E}(f_\rho) &\leq \frac{1}{2}(\mathcal{E}(\pi(f_{\mathbf{z}})) - \mathcal{E}(\pi(f_\rho))) + c_1 (\lambda^{-\frac{p}{2+p}} n^{-\frac{2}{2+p}} + n^{-1} \log(1/\delta)) \\ &\quad + c_2 \lambda^{-2} D(\lambda) (n^{-\frac{2}{2+p}} + n^{-1} \log(1/\delta)) \\ &\quad + D(\lambda) \left( 4 + \frac{16 \log(2/\delta)}{m\lambda} + \frac{32 \log^2(2/\delta)}{m^2 \lambda^2} + \sqrt{\frac{\log(2/\delta)}{m\lambda}} \right). \end{aligned}$$

By a direct computation and setting  $\tilde{\delta} = 4\delta$ , we obtain the desired result of Theorem 1.  $\square$

## B. Proof of Theorem 2

**Proof of Theorem 2.** Under the approximation condition  $D(\lambda) \leq c_\beta \lambda^\beta$ , Theorem 1 yields with confidence  $1 - \delta$

$$\begin{aligned} & \mathcal{E}(\pi(f_{\mathbf{z}})) - \mathcal{E}(f_\rho) \\ & \leq \tilde{c} \log^2(8/\delta) \left( \lambda^{-\frac{p}{2+p}} n^{-\frac{2}{2+p}} + \lambda^\beta + \lambda^{\beta-1} m^{-1} + \lambda^{\beta-2} m^{-2} + \lambda^{\beta-2} n^{-\frac{2}{2+p}} \right). \end{aligned}$$

We have  $m^{-2} \geq n^{-\frac{2}{2+p}}$  as  $m \leq n^{\frac{1}{2+p}}$ . Then, the above estimate implies that with confidence  $1 - \delta$

$$\mathcal{E}(\pi(f_{\mathbf{z}})) - \mathcal{E}(f_\rho) \leq 2\tilde{c} \log^2(8/\delta) \left( \lambda^{-\frac{p}{2+p}} m^{-2} + \lambda^\beta + \lambda^{\beta-1} m^{-1} + \lambda^{\beta-2} m^{-2} \right).$$

Setting  $\lambda = m^{-\theta}$  for some  $\theta > 0$ , we get with confidence  $1 - \delta$

$$\begin{aligned} \mathcal{E}(\pi(f_{\mathbf{z}})) - \mathcal{E}(f_\rho) & \leq 2\tilde{c} \log^2(8/\delta) \left( m^{-(2-\frac{p\theta}{2+p})} + m^{-\beta\theta} + m^{-(1-\theta+\beta\theta)} + m^{-(2-2\theta+\beta\theta)} \right) \\ & \leq 8\tilde{c} \log^2(8/\delta) m^{-\gamma}, \end{aligned}$$

where

$$\gamma = \min \left\{ 2 - \frac{p\theta}{2+p}, 2 + \beta\theta - 2\theta, \beta\theta, 1 + \beta\theta - \theta \right\}.$$

This completes the proof of Theorem 2.  $\square$

## C. Proof of Theorem 3

**Proof of Theorem 3.** Observe that  $\sum_{i=1}^n p_i = 1$ . Then

$$\begin{aligned} S(p_1, \dots, p_n) &= \sum_{i=1}^n \frac{1 - L_{ii}}{p_i} \|K_i\|_2^2 \cdot \sum_{i=1}^n p_i = \sum_{i=1}^n \left( \frac{\sqrt{1 - L_{ii}}}{\sqrt{p_i}} \|K_i\|_2 \right)^2 \cdot \sum_{i=1}^n (\sqrt{p_i})^2 \\ &\geq \sum_{i=1}^n \left( \sqrt{1 - L_{ii}} \|K_i\|_2 \right)^2, \end{aligned}$$

where the last inequality follows from the Cauchy-Schwarz inequality.

Here the Cauchy-Schwarz inequality holds under equality when  $\frac{\sqrt{1-L_{ii}}}{\sqrt{p_i}} \|K_i\|_2 = \sqrt{p_i}$ ,  $i = 1, \dots, n$ . Thus, we can set  $p_i = k^{-1} \|K_i\|_2 \sqrt{1 - L_{ii}}$  such that  $\sum_{i=1}^n p_i = 1$ . This yields the desired result in Theorem 3.  $\square$

## References

- [1] F. Cucker and S. Smale. On the mathematical foundations of learning. *Bull. Amer. Math. Soc.*, 39: 1–49, 2002.
- [2] Y. Feng, S. Lv, H. Huang, and J. Suykens. Kernelized elastic net regularization: generalization bounds and sparse recovery. *Neural Computat.*, 28: 1–38, 2016.
- [3] I. Pinelis. Optimum bounds for the distribution of martingales in Banach spaces. *Ann. Probab.*, 22: 1679–1706, 1994.
- [4] L. Shi, Y. Feng, and D.X. Zhou. Concentration estimates for learning with  $\ell_1$ -regularizer and data dependent hypothesis spaces. *Appl. Comput. Harmon. Anal.*, 31(2): 286–302, 2011.
- [5] L. Shi. Learning theory estimates for coefficient-based regularized regression. *Appl. Comput. Harmon. Anal.*, 34(2): 252–265, 2013.
- [6] Q. Wu, Y. Ying, and D.X. Zhou. Multi-kernel regularized classifiers. *J. Complexity*, 23: 108–134, 2007.
